# Supplementary material for: Bidirectional Associations of Recreational Sedentary Screen Time and 24-hour Behaviors: a dynamic cross-sectional multilevel model analysis
Source: Research Square preprint supplement (doi:10.21203/rs.3.rs-6803906/v1), 2025-06-23
Supplement: Supplementary file 3 [file c57fc0bed2a61ad985d447bf.docx]

| **Table 1.** Participant clinical and demographic characteristics**.** | |
| --- | --- |
|  | **Total (n=94)** |
| Age (years) | 42.3 (11.5) |
| 23-44 years | 59 (62.8) |
| 45-64 years | 35 (37.2) |
| Sex (female) | 77 (81.9) |
| Body mass index (kg/m²) | 29.8 (7.8) |
| Normal | 27 (28.7) |
| Overweight | 32 (34.0) |
| Obese | 35 (37.2) |
| Ethnicity |  |
| Hispanic/Latino | 21 (22.3) |
| Race |  |
| White | 73 (77.7) |
| Black or African American | 5 (5.3) |
| Asian | 9 (9.6) |
| Native American or Alaskan Native | 2 (2.1) |
| Pacific Islander | 1 (1.1) |
| Other | 6 (6.4) |
| Education |  |
| Obtained GED | 1 (1.1) |
| High school graduate | 1 (1.1) |
| Completed some college credit, no degree | 14 (14.9) |
| Associate's degree | 6 (6.4) |
| Bachelor's degree | 29 (30.9) |
| Master's, professional, or doctoral degree | 43 (45.7) |
| Chronotype |  |
| Evening | 8 (8.5) |
| Morning | 39 (41.5) |
| Intermediate | 47 (50.0) |
| Data are n (%); age and body mass index are mean (SD). | |

| **Table 2.** Daily means and standard deviations for rSST and 24-hour behaviors. | |
| --- | --- |
|  | **Total (n=94)** |
| Waking day (activPAL) (min) |  |
| Total sedentary time | 638.8 (96.1) |
| Total rSST | 182.5 (125.7) |
| Daytime rSST | 81.6 (80.3) |
| Evening rSST | 101.0 (60.0) |
| Other non-rSST sedentary time | 456.3 (138.8) |
| Standing time | 221.3 (68.5) |
| Light physical activity | 68.7 (28.1) |
| Moderate-vigorous physical activity | 18.6 (15.6) |
| Device wear time | 947.5 (50.1) |
| Device non-wear Time | 18.5 (21.9) |
| Sleep (GENEActiv) | **(n=86)** |
| Time in bed (min) | 470.7 (51.8) |
| Sleep duration (min) | 410.2 (49.1) |
| Nights (count) | 7.2 (1.8) |
| Non-wear (%) | 0.3 (0.9) |
| Daily summary |  |
| 24-hour day (wake and sleep) (min) | 1361.7 (45.8) |
| Total waking day (min) | 947.5 (50.1) |
| Day time (min) | 588.3 (79.0) |
| Evening time (min) | 359.6 (75.5) |
| Steps (count) | 6780.8 (2851.2) |
| Included days (count) | 8.0 (1.6) |
| The data are mean (SD) from participants with valid daily activPAL (n=94) data (≥4 days of ≥10 waking hours and available screen time) and nightly GENEActiv data (n=86). rSST=recreational sedentary screen time. | |

| **Table 3.** Multilevel models of the relationships between total rSST and 24-hour behaviors. | | | | | | | | | | | | | | | |
| --- | --- | --- | --- | --- | --- | --- | --- | --- | --- | --- | --- | --- | --- | --- | --- |
| Total rSST associations with 24-hour behaviors | | | | | | | | | | | | | | | |
|  | Model 1a: total rSST →other-SED | | |  | Model 1b: total rSST →STAND | | |  | Model 1c: total rSST →LPA | | |  | Model 1d: total rSST →MVPA | | |
| Parameter | β | SE | *p* |  | β | SE | *p* |  | β | SE | *p* |  | β | SE | *p* |
| Total rSST (between-person) | **-45.73** | **4.26** | **<.01** |  | **-9.77** | **3.11** | **<.01** |  | -1.73 | 1.39 | 0.21 |  | -0.83 | 0.76 | 0.28 |
| Total rSST (within-person) | **-43.27** | **1.92** | **<.01** |  | **-9.38** | **1.43** | **<.01** |  | **-2.09** | **0.56** | **<.01** |  | **-0.70** | **0.27** | **0.01** |
|  |  |  |  |  |  |  |  |  |  |  |  |  |  |  |  |
| 24-hour behavior associations with total rSST | | | | | | | | | | | | | | | |
|  | Model 2a: other-SED→total rSST | | |  | Model 2b: STAND →total rSST | | |  | Model 2c: LPA  →total rSST | | |  | Model 2d: MVPA →total rSST | | |
| Parameter | β | SE | *p* |  | β | SE | *p* |  | β | SE | *p* |  | β | SE | *p* |
| 24-hour behavior (between-person) | **-43.71** | **4.03** | **<.01** |  | **-34.41** | **11.18** | **<.01** |  | -33.07 | 27.53 | 0.23 |  | -55.82 | 50.24 | 0.27 |
| 24-hour behavior (within-person) | **-36.09** | **1.61** | **<.01** |  | **-23.68** | **3.59** | **<.01** |  | **-35.89** | **9.55** | **<.01** |  | **-50.11** | **19.64** | **0.01** |
|  |  |  |  |  |  |  |  |  |  |  |  |  |  |  |  |
| Note. beta estimates (β) and standard errors (SE) are scaled hourly. Significant p-values (p) are bolded (p<0.05). Data are in minutes. Model 1 examined the associations of total rSST (independent variable) with 24-hour behaviors, other-SED (model 1a), STAND (model 1b), LPA (model 1c), and MVPA (model 1d) (dependent variables).  Model 2 examined the associations of 24-hour behaviors, other-SED (model 2a), STAND (model 2b), LPA (model 2c), and MVPA (model 2d), (independent variables) with total rSST (dependent variable).  All models were adjusted for age, sex, chronotype, BMI, weekday/weekend, education, and the linear associations of change in the outcome. rSST=recreational sedentary screen time, other-SED=other non-rSST sedentary time, STAND=standing time, LPA=light-physical activity, MVPA=moderate-vigorous physical activity. | | | | | | | | | | | | | | | |

| **Table 4.** Multilevel models of the relationships between daytime and evening rSST and 24-hour behaviors. | | | | | | | | | | | | | | | |
| --- | --- | --- | --- | --- | --- | --- | --- | --- | --- | --- | --- | --- | --- | --- | --- |
| Daytime rSST associations with 24-hour behaviors | | | | | | | | | | | | | | | |
|  | Model 1.1a: daytime rSST→other-SED | | |  | Model 1.1b: daytime rSST→STAND | | |  | Model 1.1c: daytime rSST→LPA | | |  | Model 1.1d: daytime rSST→MVPA | | |
| Parameter | β | SE | *p* |  | β | SE | *p* |  | β | SE | *p* |  | β | SE | *p* |
| Daytime rSST (between-person) | **-66.35** | **7.37** | **<.01** |  | **-15.18** | **4.93** | **<.01** |  | -3.36 | 2.18 | 0.12 |  | -1.27 | 1.20 | 0.29 |
| Daytime rSST (within-person) | **-55.57** | **3.09** | **<.01** |  | **-11.74** | **2.12** | **<.01** |  | **-2.68** | **0.83** | **<.01** |  | **-1.25** | **0.40** | **<.01** |
|  |  |  |  |  |  |  |  |  |  |  |  |  |  |  |  |
| 24-hour behavior associations with daytime rSST | | | | | | | | | | | | | | | |
|  | Model 1.2a: other-SED→daytime rSST | | |  | Model 1.2b: STAND →daytime rSST | | |  | Model 1.2c: LPA  →daytime rSST | | |  | Model 1.2d: MVPA  →daytime rSST | | |
| Parameter | β | SE | *p* |  | β | SE | *p* |  | β | SE | *p* |  | β | SE | *p* |
| 24-hour behavior (between-person) | **-25.36** | **2.78** | **<.01** |  | **-21.40** | **7.10** | **<.01** |  | -26.15 | 17.33 | 0.13 |  | -34.20 | 31.76 | 0.28 |
| 24-hour behavior (within-person) | **-21.31** | **1.19** | **<.01** |  | **-13.64** | **2.46** | **<.01** |  | **-21.07** | **6.49** | **<.01** |  | **-41.05** | **13.29** | **<.01** |
|  |  |  |  |  |  |  |  |  |  |  |  |  |  |  |  |
|  |  |  |  |  |  |  |  |  |  |  |  |  |  |  |  |
| Evening rSST associations with 24-hour behaviors | | | | | | | | | | | | | | | |
|  | Model 2.1a: evening rSST→other-SED | | |  | Model 2.1b: evening rSST→STAND | | |  | Model 2.1c: evening rSST→LPA | | |  | Model 2.1d: evening rSST→MVPA | | |
| Parameter | β | SE | *p* |  | β | SE | *p* |  | β | SE | *p* |  | β | SE | *p* |
| Evening rSST (between-person) | **-84.61** | **10.16** | **<.01** |  | **-16.28** | **6.66** | **0.01** |  | -1.67 | 2.93 | 0.57 |  | -1.40 | 1.60 | 0.38 |
| Evening rSST (within-person) | **-54.87** | **3.95** | **<.01** |  | **-12.34** | **2.55** | **<.01** |  | **-2.68** | **0.99** | **0.01** |  | -0.40 | 0.49 | 0.42 |
|  |  |  |  |  |  |  |  |  |  |  |  |  |  |  |  |
| 24-hour behavior associations with evening rSST | | | | | | | | | | | | | | | |
|  | Model 2.2a: other- SED→evening rSST | | |  | Model 2.2b: STAND  →evening rSST | | |  | Model 2.2c: LPA  →evening rSST | | |  | Model 2.2d: MVPA  →evening rSST | | |
| Parameter | β | SE | *p* |  | β | SE | *p* |  | β | SE | *p* |  | β | SE | *p* |
| 24-hour behavior (between-person) | **-18.43** | **2.18** | **<.01** |  | **-12.99** | **5.46** | **0.02** |  | -6.82 | 13.23 | 0.61 |  | -21.77 | 24.05 | 0.37 |
| 24-hour behavior (within-person) | **-14.75** | **1.07** | **<.01** |  | **-10.05** | **2.07** | **<.01** |  | **-14.85** | **5.45** | **0.01** |  | -9.03 | 11.21 | 0.42 |
|  |  |  |  |  |  |  |  |  |  |  |  |  |  |  |  |
| Note. beta estimates (β) and standard errors (SE) are scaled hourly. Significant p-values (p) are bolded (p<0.05). Data are in minutes.  Model 1.1 examined the associations of daytime rSST (independent variable) with 24-hour behaviors, other-SED (model 1.1a), STAND (model 1.1b), LPA (model 1.1c), and MVPA (model 1.1d) (dependent variables).  Model 1.2 examined the associations of 24-hour behaviors, other-SED (model 1.2a), STAND (model 1.2b), LPA (model 1.2c), and MVPA (model 1.2d), (independent variables) with daytime rSST (dependent variable).  Model 2.1 examined the associations of evening rSST (independent variable) with 24-hour behaviors, other-SED (model 2.1a), STAND (model 2.1b), LPA (model 2.1c), and MVPA (model 2.1d) (dependent variables).  Model 2.2 examined the associations of 24-hour behaviors, other-SED (model 2.2a), STAND (model 2.2b), LPA (model 2.2c), and MVPA (model 2.2d), (independent variables) with evening rSST (dependent variable).  All models were adjusted for age, sex, chronotype, BMI, weekday/weekend, education, and the linear associations of change in the outcome.  rSST=recreational sedentary screen time, other-SED=other non-rSST sedentary time, STAND=standing time, LPA=light-physical activity, MVPA=moderate-vigorous physical activity. | | | | | | | | | | | | | | | |

| **Table 5.** Multilevel models of the associations between rSST variables and SLEEP. | | | | | | | | | | | |
| --- | --- | --- | --- | --- | --- | --- | --- | --- | --- | --- | --- |
| rSST (total, daytime, evening) variables association with subsequent night SLEEP | | | | | | | | | | | |
|  | Total rSST | | |  | Daytime rSST | | |  | Evening rSST | | |
|  | Model 3a: total rSST→ subsequent night SLEEP | | |  | Model 3b: daytime rSST→ subsequent night SLEEP | | |  | Model 3c: evening rSST→ subsequent night SLEEP | | |
| Parameter | β | SE | *p* |  | β | SE | *p* |  | β | SE | *p* |
| rSST variable (between-person) | -2.71 | 2.06 | 0.19 |  | -4.97 | 3.23 | 0.12 |  | -3.32 | 4.47 | 0.46 |
| rSST variable (within-person) | 0.60 | 1.36 | 0.66 |  | 2.78 | 1.93 | 0.15 |  | -2.56 | 2.48 | 0.30 |
|  |  |  |  |  |  |  |  |  |  |  |  |
| Previous night SLEEP association with next day rSST (total, daytime, evening) variables | | | | | | | | | | | |
|  | Total rSST | | |  | Daytime rSST | | |  | Evening rSST | | |
|  | Model 4a: previous night SLEEP→next day total rSST | | |  | Model 4b: previous night SLEEP→next day daytime rSST | | |  | Model 4c: previous night SLEEP→next day evening rSST | | |
| Parameter | β | SE | *p* |  | β | SE | *p* |  | β | SE | *p* |
| SLEEP (between-person) | -26.44 | 18.73 | 0.16 |  | -18.38 | 12.02 | 0.13 |  | -8.23 | 8.84 | 0.35 |
| SLEEP (within-person) | -0.89 | 5.12 | 0.86 |  | 1.13 | 3.55 | 0.75 |  | -2.03 | 2.86 | 0.48 |
|  |  |  |  |  |  |  |  |  |  |  |  |
| Note. beta estimates (β) and standard errors (SE) are scaled hourly. Significant p-values (p) are bolded (p<0.05). Data are in minutes.  Model 3 examined the association of total rSST (3a), daytime rSST(3b), and evening rSST (3c) variables (independent variables) with the subsequent night SLEEP (dependent variable).  Model 4 examined the association of the previous night's SLEEP (independent variable) with the next day's total rSST (4a), daytime rSST (4b), and evening rSST (4c) variables (dependent variables).  All models were adjusted for age, sex, chronotype, BMI, weekday/weekend, education, and the linear associations of change in the outcome.  rSST=recreational sedentary screen time, SLEEP=sleep duration. | | | | | | | | | | | |
